# Supplementary material for: Detection and attribution of trends of meteorological extremes in Central America
Source: Springer Nature journal article supplement (doi:10.1007/s10584-025-03940-5), 2025-04-30
Supplement: MOESM1 [file 10584_2025_3940_MOESM1_ESM.pdf]

**Supplementary information of:**  
**Detection and attribution of trends of meteorological extremes in Central America**  
Climatic Change

By:

Hidalgo, H.G.; Chou-Chen, S.W.; McKinnon, K. A.; Pascale, S.; Quesada-Chacón, D.; Alfaro, E.J.; Bautista-Solís, P.; Pérez-Briceño, P.M.; Diaz, H.F., Maldonado, T., Rivera, E. R., Nakaegawa, T.

**Section 1. Tables of the models used in the study and on the definition of extreme indices of precipitation and temperature calculated from daily precipitation, maximum and minimum data.**

Table S1. CMIP6 General Circulation Models (CGMs) used in this analysis.

| <b>ID</b> | <b>Model</b>  | <b>Climate Center</b>                                                                                                              | <b>Run</b> | <b>Native resolution</b> |
|-----------|---------------|------------------------------------------------------------------------------------------------------------------------------------|------------|--------------------------|
| 1         | GFDL-ESM4     | Geophysical Fluid Dynamics Laboratory (GFDL)                                                                                       | r1i1p1f1   | lonlat (288x180)         |
| 2         | IPSL-CM6A-LR  | Institut Pierre-Simon Laplace (IPSL)                                                                                               | r1i1p1f1   | lonlat (144x143)         |
| 3         | MPI-ESM1-2-HR | Max Planck Institute for Meteorology (MPI-M)                                                                                       | r1i1p1f1   | gaussian (384x192)       |
| 4         | MRI-ESM2-0    | Meteorological Research Institute (MRI)                                                                                            | r1i1p1f1   | gaussian (320x160)       |
| 5         | UKESM1-0-LL   | UK Earth System Modelling                                                                                                          | r1i1p1f2   | lonlat (192x144)         |
| 6         | CanESM5       | Canadian Centre for Climate Modelling and Analysis (CCCMA)                                                                         | r1i1p1f1   | gaussian (128x64)        |
| 7         | CNRM-CM6-1    | Centre National de Recherches Meteorologiques / Centre 3 Europeen de Recherche et Formation Avancees en Calcul Scientifique (CNRM) | r1i1p1f2   | gaussian (256x128)       |
| 8         | CNRM-ESM2-1   | CNRM                                                                                                                               | r1i1p1f2   | gaussian (256x128)       |
| 9         | EC-Earth3     | EC-EARTH consortium                                                                                                                | r1i1p1f1   | gaussian (512x256)       |

|    |        |                                                                                                                                                                                      |          |                    |
|----|--------|--------------------------------------------------------------------------------------------------------------------------------------------------------------------------------------|----------|--------------------|
| 10 | MIROC6 | Atmosphere and Ocean Research Institute (The University of 3 Tokyo), National Institute for Environmental Studies, and Japan Agency for Marine-Earth Science and Technology. (MIROC) | r1i1p1f1 | gaussian (256x128) |
|----|--------|--------------------------------------------------------------------------------------------------------------------------------------------------------------------------------------|----------|--------------------|

Table S2. List of precipitation indices from CLIMDEX. RR=rainfall rate.

| ID | Name   | Indicator name                                                                | Definition                                                               | Units  |
|----|--------|-------------------------------------------------------------------------------|--------------------------------------------------------------------------|--------|
| 1  | RX1day | max 1-day precipitation amount                                                | annual maximum 1-day precipitation                                       | mm     |
| 2  | RX5day | max 5-day precipitation amount                                                | annual maximum 5-day precipitation                                       | mm     |
| 3  | SDII   | simple daily intensity index                                                  | annual total precipitation divided by the number of wet days in the year | mm/day |
| 4  | R10mm  | number of heavy precipitation days                                            | annual count of days when precipitation $\geq$ 10mm                      | days   |
| 5  | R20mm  | number of very heavy precipitation days                                       | annual count of days when precipitation $\geq$ 20mm                      | days   |
| 6  | CDD    | consecutive dry days & maximum number of consecutive days with daily rainfall | maximum number of consecutive days with daily rainfall < 1mm             | days   |
| 7  | CWD    | consecutive wet days                                                          | maximum number of consecutive days with daily rainfall $\geq$ 1mm        | days   |
| 8  | R95p   | very wet days                                                                 | annual total PRCP when RR > 95th percentile                              | mm     |
| 9  | R99p   | extremely wet days                                                            | annual total PRCP when RR > 99th percentile                              | mm     |

|    |         |                                    |                                               |    |
|----|---------|------------------------------------|-----------------------------------------------|----|
| 10 | PRCPTOT | annual total wet-day precipitation | annual total PRCP in wet days (RR $\geq$ 1mm) | mm |
|----|---------|------------------------------------|-----------------------------------------------|----|

Table S3. List of temperature indices from CLIMDEX.

| ID | Name  | Indicator name                | Definition                                                                      | Units  |
|----|-------|-------------------------------|---------------------------------------------------------------------------------|--------|
| 1  | TXx   | max Tmax                      | annual maximum value of daily maximum temperature                               | °C     |
| 2  | TNx   | max Tmin                      | annual maximum value of daily minimum temp                                      | °C     |
| 3  | TXn   | min Tmax                      | annual minimum value of daily maximum temperature                               | °C     |
| 4  | TNn   | min Tmin                      | annual minimum value of daily minimum temp                                      | °C     |
| 5  | TN10p | cool nights                   | percentage of days when TN < 10th percentile                                    | % days |
| 6  | TN90p | warm nights                   | percentage of days when TN > 90th percentile                                    | % days |
| 7  | TX10p | cool days                     | percentage of days when TX < 10th percentile                                    | % days |
| 8  | TX90p | warm days                     | percentage of days when TX > 90th percentile                                    | % days |
| 9  | WSDI  | warm spell duration indicator | annual count of days with at least 6 consecutive days when TX > 90th percentile | % days |
| 10 | CSDI  | cold spell duration indicator | annual count of days with at least 6 consecutive days when TN < 10th percentile | % days |
| 11 | DTR   | diurnal temperature range     | annual mean difference between TX and TN                                        | °C     |

**Section 2. Examples of the effect on the December-January-February (DJF) precipitation noise traces by fitting equation 3 with different types of Atlantic/Caribbean predictors.**

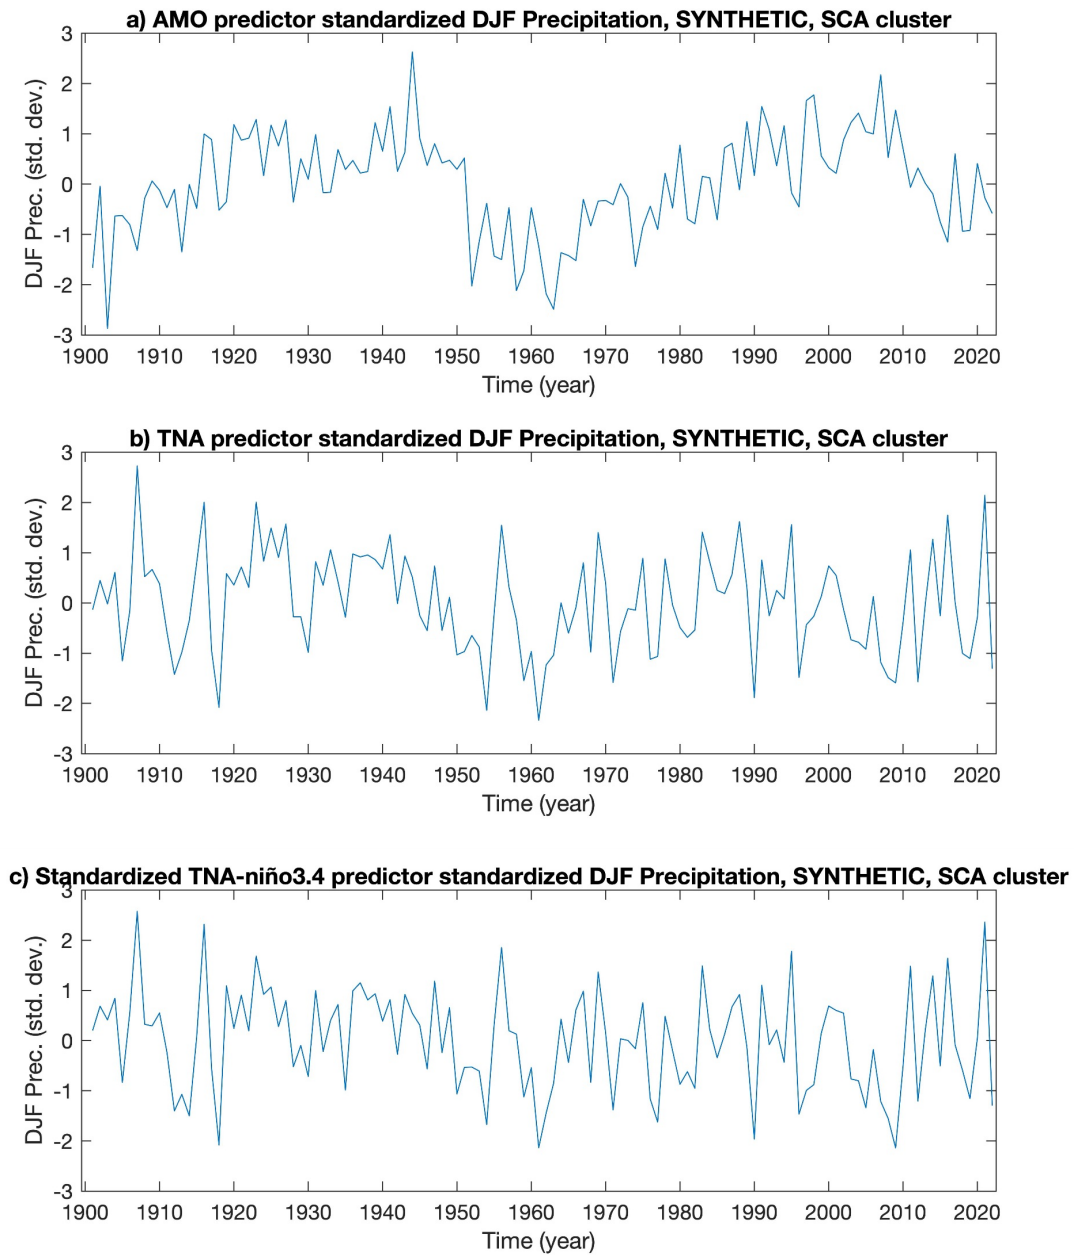

Figure S1. Standardized December-January-February precipitation (PDJF) example traces for three versions of fitting Eq. 3 using Atlantic Multidecadal Oscillation (AMO) (top), Tropical North Atlantic (TNA index) (middle) and a composite index of the difference between standardized versions of the TNA minus niño3.4 datasets. For each of these ways to fit the Eq. 3, 1000 traces of the noise were generated synthetically. Time series shown for the SCP cluster.

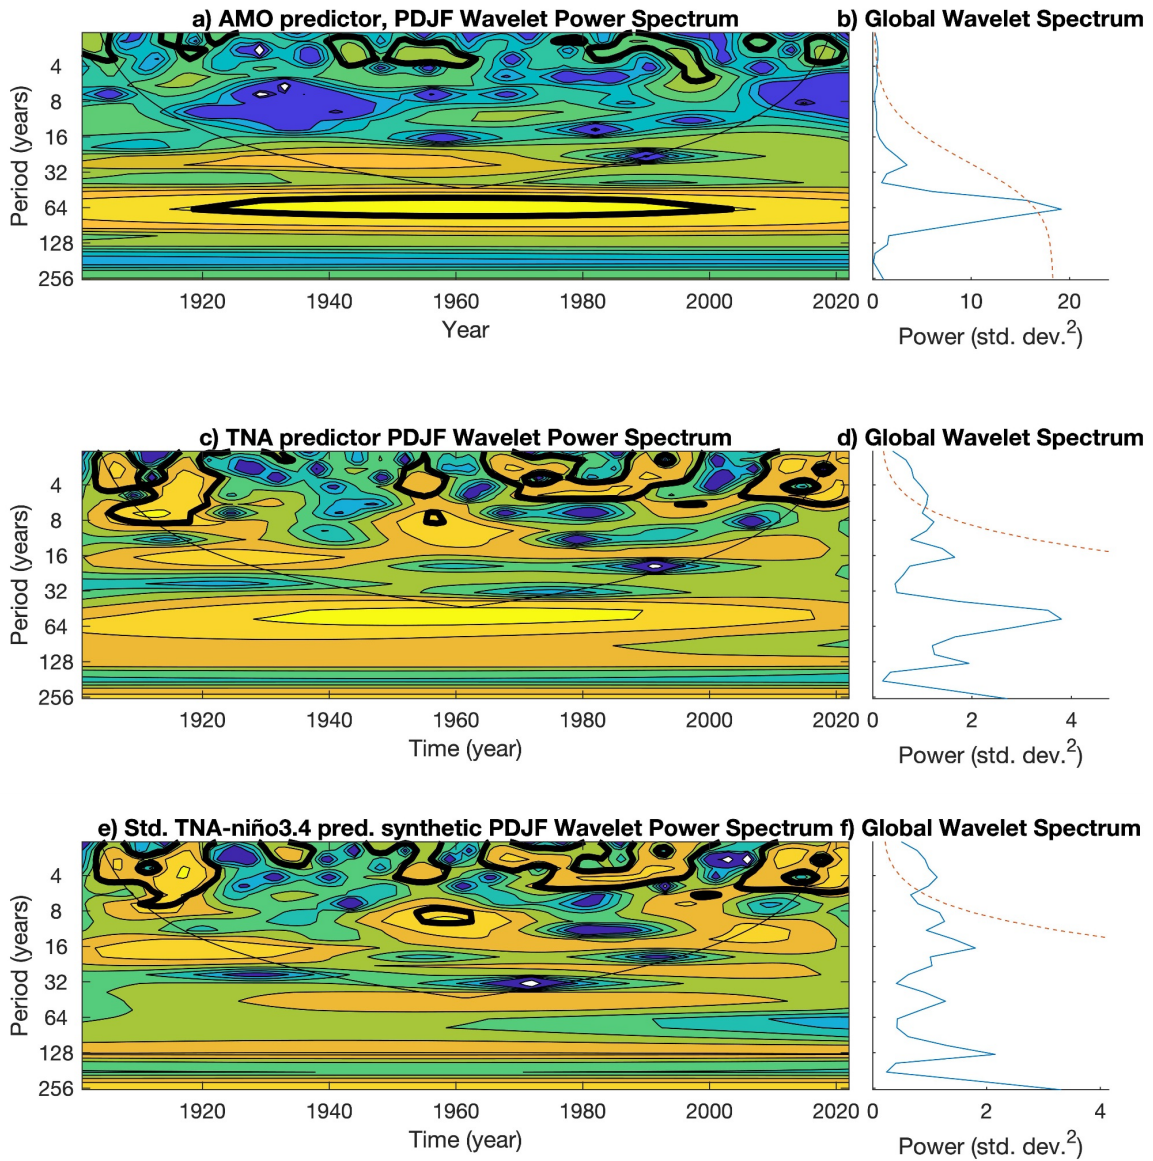

Figure S2. Same as Fig. S1, but for the wavelet power spectrum according to Torrence and Compo (1998). The mother wavelet is Morlet,  $dt=1$ ,  $pad=1$ ,  $dj=0.25$ ,  $s0=2*dt$ ,  $j1=7/dj$ ,  $lag1=0.72$ . The dark thick lines represent places in the spectrum that are significantly above the red-noise background. The cone of influence below plots (a), (c), and (e) represents frequencies of signals that are by the boundaries of the plot and should be interpreted with caution. The plots on the right represent the global spectrum as an integration of the data for all the times.

**Section 3. Precipitation and temperature climatologies of the clusters of Fig. 1.**

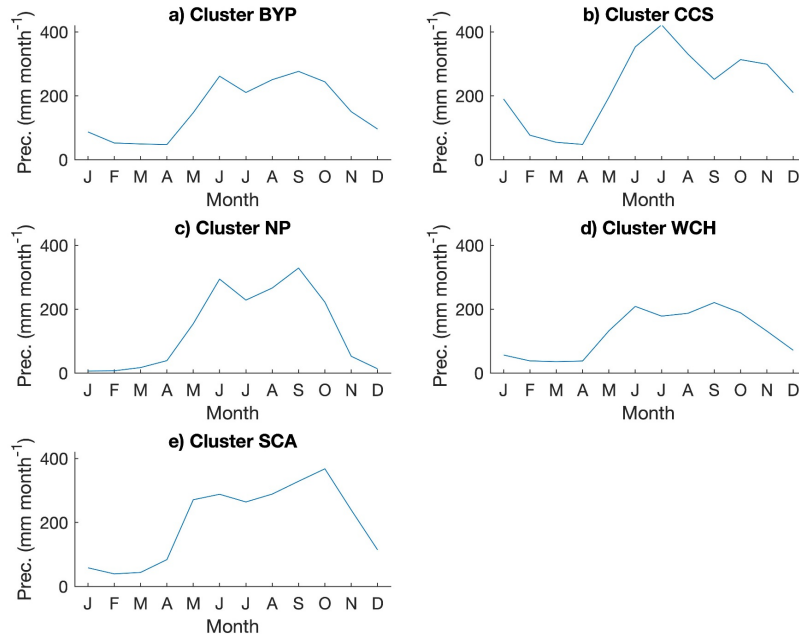

Figure S3. Seasonal cycles of precipitation for the clusters defined in Fig.1.

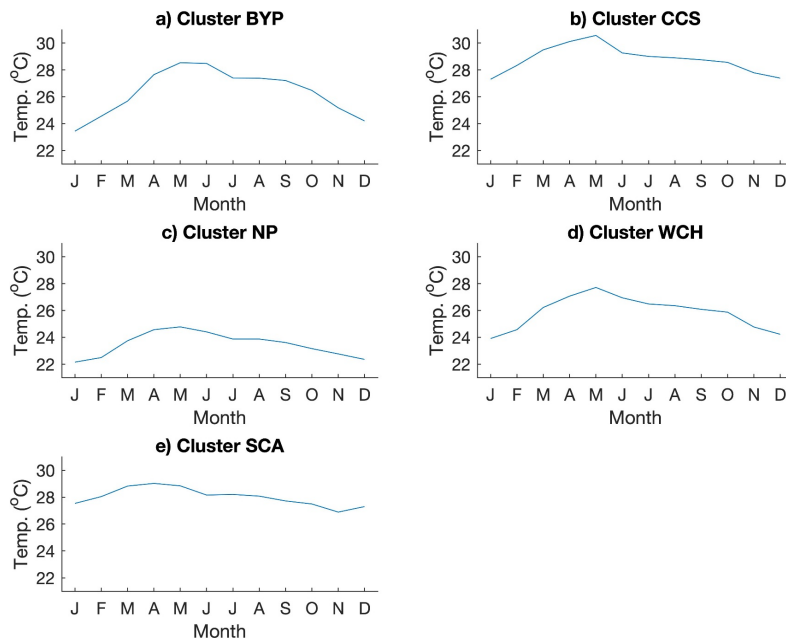

Figure S4. Seasonal cycles of temperature for the clusters defined in Fig.1.

Cluster BYP is similar to WCH in terms of the relative seasonal cycle of precipitation distribution throughout the year, but BYP has more absolute monthly accumulations during the wet season. BYP is a region where

multiple tropical cyclones from the Caribbean make landfall (more than in WCH) and that may explain a difference in the distribution of extreme precipitation that ultimately is reflected in monthly accumulations. CCS has the wettest month and a remarkable distribution that stands out from the rest (clearly a Caribbean slope type of distribution). NP is the only one with a clear dry season (although other regions may have dry seasons but are averaged with other regions that present significant rainfall from December to March). SCA has an earlier start of the rainy season of all distributions.

Temperature-wise, BYP, CCS and SCA showed the highest temperatures, WCH is moderate and NP is the coldest region. The combination of very hot-wet versus moderate temp-rain may also explain the difference between cluster BYP and WCH.

**Section 4. Table of statistics related to the fit of equation 3.**

Table S4. Fitting parameters for Eq. 3. See definitions of the variables in tables S2 and S3 and definition of the clusters in Fig. 1.

| Variable | Cluster | $\beta_0$<br>( <i>inter.</i> ) | $\beta_1$<br>( <i>Niño3.4</i> ) | $\beta_2$<br>( <i>CLLJ</i> ) | $\beta_3$<br>( <i>PDO<sub>perp</sub></i> ) | $\beta_4$<br>( <i>F<sub>y</sub></i> ) | r <sup>2</sup> |
|----------|---------|--------------------------------|---------------------------------|------------------------------|--------------------------------------------|---------------------------------------|----------------|
| RX1day   | SCA     | -1.36                          | 0.69                            | -0.03                        | -0.03                                      | 2.75                                  | 0.51           |
|          | BYP     | -1.11                          | 0.55                            | -0.15                        | -0.15                                      | 2.52                                  | 0.38           |
|          | NP      | -0.65                          | 0.23                            | 0.15                         | 0.15                                       | 1.14                                  | 0.22           |
|          | WCH     | -0.78                          | -0.07                           | 0.31                         | 0.31                                       | 1.49                                  | 0.17           |
|          | CCS     | 1.25                           | -0.32                           | -0.50                        | -0.50                                      | -2.35                                 | 0.62           |
| RX5day   | SCA     | -0.12                          | 0.69                            | 0.48                         | 0.48                                       | 0.02                                  | 0.50           |
|          | BYP     | 0.80                           | -0.36                           | -0.19                        | -0.19                                      | -1.44                                 | 0.32           |
|          | NP      | -0.83                          | 0.10                            | -0.07                        | -0.07                                      | 1.69                                  | 0.11           |
|          | WCH     | 0.85                           | -0.01                           | -0.74                        | -0.74                                      | -1.55                                 | 0.47           |
|          | CCS     | -1.86                          | 0.52                            | 0.29                         | 0.29                                       | 3.78                                  | 0.81           |
| SDII     | SCA     | -1.15                          | 0.36                            | 0.45                         | 0.45                                       | 2.25                                  | 0.50           |
|          | BYP     | -2.09                          | 0.36                            | -0.14                        | -0.14                                      | 4.32                                  | 0.67           |
|          | NP      | 1.25                           | -0.76                           | 0.18                         | 0.18                                       | -2.58                                 | 0.45           |
|          | WCH     | -1.32                          | 0.50                            | 0.35                         | 0.35                                       | 2.72                                  | 0.58           |
|          | CCS     | 1.29                           | -0.50                           | -0.18                        | -0.18                                      | -2.53                                 | 0.48           |
| R10mm    | SCA     | 1.07                           | -0.79                           | -0.22                        | -0.22                                      | -2.04                                 | 0.64           |
|          | BYP     | -0.63                          | -0.08                           | -0.12                        | -0.12                                      | 1.29                                  | 0.07           |
|          | NP      | -1.82                          | 0.66                            | -0.41                        | -0.41                                      | 3.88                                  | 0.59           |
|          | WCH     | 0.59                           | -0.40                           | -0.47                        | -0.47                                      | -0.95                                 | 0.43           |

|       |     |       |       |       |       |       |      |
|-------|-----|-------|-------|-------|-------|-------|------|
|       | CCS | -1.73 | 0.70  | -0.43 | -0.43 | 3.75  | 0.56 |
| R20mm | SCA | -1.36 | 0.66  | 0.27  | 0.27  | 2.76  | 0.65 |
|       | BYP | 0.75  | -0.37 | -0.19 | -0.19 | -1.34 | 0.30 |
|       | NP  | 1.37  | -0.62 | -0.16 | -0.16 | -2.62 | 0.65 |
|       | WCH | -1.73 | 0.55  | -0.17 | -0.17 | 3.61  | 0.53 |
|       | CCS | -1.41 | 0.10  | -0.17 | -0.17 | 3.08  | 0.27 |
| CDD   | SCA | 0.53  | -0.75 | -0.58 | -0.58 | -0.84 | 0.73 |
|       | BYP | -1.19 | 0.18  | -0.36 | -0.36 | 2.34  | 0.40 |
|       | NP  | -2.11 | 0.59  | -0.05 | -0.05 | 4.33  | 0.81 |
|       | WCH | -0.73 | 0.03  | -0.06 | -0.06 | 1.47  | 0.09 |
|       | CCS | 1.24  | -0.51 | -0.17 | -0.17 | -2.44 | 0.46 |
| CWD   | SCA | -1.05 | 0.90  | 0.26  | 0.26  | 2.10  | 0.73 |
|       | BYP | -0.64 | 0.65  | -0.55 | -0.55 | 1.60  | 0.29 |
|       | NP  | -1.55 | -0.04 | -0.17 | -0.17 | 3.31  | 0.30 |
|       | WCH | 0.54  | -0.41 | -0.47 | -0.47 | -0.86 | 0.41 |
|       | CCS | 0.95  | 0.10  | -0.91 | -0.91 | -1.63 | 0.69 |
| R95p  | SCA | -1.56 | -0.02 | -0.03 | -0.03 | 3.36  | 0.32 |
|       | BYP | -1.67 | 0.52  | -0.19 | -0.19 | 3.45  | 0.50 |
|       | NP  | 1.33  | -0.63 | -0.16 | -0.16 | -2.55 | 0.64 |
|       | WCH | 0.21  | 0.53  | -0.63 | -0.63 | -0.41 | 0.21 |
|       | CCS | -1.07 | 0.47  | -0.49 | -0.49 | 2.37  | 0.24 |
| R99p  | SCA | 0.50  | -0.75 | -0.57 | -0.57 | -0.78 | 0.71 |

|         |     |       |       |       |       |       |      |
|---------|-----|-------|-------|-------|-------|-------|------|
|         | BYP | -0.43 | 0.78  | 0.20  | 0.20  | 0.63  | 0.49 |
|         | NP  | -0.71 | 0.01  | 0.28  | 0.28  | 1.24  | 0.25 |
|         | WCH | -1.18 | 0.20  | 0.00  | 0.00  | 2.54  | 0.22 |
|         | CCS | -0.99 | 0.67  | -0.31 | -0.31 | 2.16  | 0.29 |
| PRCPTOT | SCA | 1.21  | 0.45  | 0.53  | 0.53  | -2.69 | 0.43 |
|         | BYP | -1.07 | 0.24  | 0.43  | 0.43  | 2.06  | 0.40 |
|         | NP  | -0.79 | 0.86  | -0.11 | -0.11 | 1.67  | 0.40 |
|         | WCH | -1.07 | 0.68  | -0.53 | -0.53 | 2.38  | 0.32 |
|         | CCS | -0.51 | 0.43  | 0.05  | 0.05  | 0.82  | 0.29 |
| TXx     | SCA | -0.52 | -0.30 | -0.95 | -0.95 | 1.34  | 0.62 |
|         | BYP | -0.82 | 0.05  | 0.51  | 0.51  | 1.40  | 0.42 |
|         | NP  | -0.72 | -0.73 | -0.57 | -0.57 | 1.68  | 0.58 |
|         | WCH | 0.14  | 0.00  | -0.22 | -0.22 | -0.19 | 0.04 |
|         | CCS | -0.52 | -0.25 | 0.09  | 0.09  | 1.03  | 0.06 |
| TNx     | SCA | -0.46 | -0.12 | 0.52  | 0.52  | 0.77  | 0.19 |
|         | BYP | -1.32 | -0.33 | 0.05  | 0.05  | 2.66  | 0.29 |
|         | NP  | -0.59 | -0.66 | -0.68 | -0.68 | 1.42  | 0.62 |
|         | WCH | 0.18  | -0.23 | -0.85 | -0.85 | -0.16 | 0.53 |
|         | CCS | -0.16 | -0.21 | -0.22 | -0.22 | 0.45  | 0.07 |
| TXn     | SCA | 0.69  | -0.18 | -0.16 | -0.16 | -1.33 | 0.13 |
|         | BYP | -0.96 | -0.28 | 0.03  | 0.03  | 1.95  | 0.16 |
|         | NP  | -0.15 | 0.02  | 0.02  | 0.02  | 0.26  | 0.01 |

|       |     |       |       |       |       |       |      |
|-------|-----|-------|-------|-------|-------|-------|------|
|       | WCH | 0.11  | -0.10 | -0.74 | -0.74 | -0.07 | 0.34 |
|       | CCS | 1.16  | -0.03 | -0.53 | -0.53 | -2.19 | 0.44 |
| TNn   | SCA | -0.56 | -0.17 | -0.94 | -0.94 | 1.40  | 0.54 |
|       | BYP | -0.14 | -0.52 | -0.26 | -0.26 | 0.42  | 0.21 |
|       | NP  | 0.20  | -0.62 | -0.59 | -0.59 | -0.17 | 0.55 |
|       | WCH | -0.23 | -0.12 | 0.61  | 0.61  | 0.23  | 0.22 |
|       | CCS | 0.96  | -0.01 | -0.49 | -0.49 | -1.78 | 0.36 |
| TN10p | SCA | -0.54 | -0.10 | -0.89 | -0.89 | 1.33  | 0.46 |
|       | BYP | -0.44 | -0.49 | -0.28 | -0.28 | 1.04  | 0.21 |
|       | NP  | -0.64 | -0.38 | -0.76 | -0.76 | 1.52  | 0.50 |
|       | WCH | -0.09 | 0.12  | -0.72 | -0.72 | 0.41  | 0.24 |
|       | CCS | -0.16 | 0.50  | -0.36 | -0.36 | 0.40  | 0.09 |
| TN90p | SCA | -0.57 | -0.23 | -1.06 | -1.06 | 1.48  | 0.70 |
|       | BYP | -0.27 | 0.11  | -0.11 | -0.11 | 0.41  | 0.11 |
|       | NP  | -0.68 | -0.21 | -0.78 | -0.78 | 1.63  | 0.42 |
|       | WCH | -0.21 | -0.04 | -0.67 | -0.67 | 0.58  | 0.25 |
|       | CCS | 1.38  | 0.59  | -0.41 | -0.41 | -2.75 | 0.40 |
| TX10p | SCA | -1.39 | 0.06  | -0.44 | -0.44 | 3.07  | 0.29 |
|       | BYP | 0.16  | -0.68 | -0.25 | -0.25 | -0.10 | 0.37 |
|       | NP  | -0.77 | -0.64 | -0.69 | -0.69 | 1.82  | 0.62 |
|       | WCH | -0.25 | -0.06 | -0.41 | -0.41 | 0.50  | 0.15 |
|       | CCS | 0.17  | -0.24 | -0.13 | -0.13 | -0.28 | 0.06 |

|       |     |       |       |       |       |       |      |
|-------|-----|-------|-------|-------|-------|-------|------|
| TX90p | SCA | -0.56 | 0.36  | -0.66 | -0.66 | 1.44  | 0.23 |
|       | BYP | -0.64 | -0.44 | 0.06  | 0.06  | 1.28  | 0.12 |
|       | NP  | -0.96 | -0.11 | -0.82 | -0.82 | 2.22  | 0.44 |
|       | WCH | -0.19 | -0.25 | -0.83 | -0.83 | 0.58  | 0.48 |
|       | CCS | -0.25 | -0.45 | 0.05  | 0.05  | 0.46  | 0.10 |
| WSDI  | SCA | -0.38 | 0.31  | 0.09  | 0.09  | 0.63  | 0.14 |
|       | BYP | -0.85 | -0.20 | 0.14  | 0.14  | 1.61  | 0.19 |
|       | NP  | -1.04 | -0.12 | -0.76 | -0.76 | 2.32  | 0.42 |
|       | WCH | -0.54 | -0.07 | -0.68 | -0.68 | 1.29  | 0.27 |
|       | CCS | 0.61  | -0.19 | -0.41 | -0.41 | -1.11 | 0.24 |
| CSDI  | SCA | -0.54 | -0.01 | -0.18 | -0.18 | 1.12  | 0.05 |
|       | BYP | -0.54 | -0.59 | -0.10 | -0.10 | 1.17  | 0.19 |
|       | NP  | -0.50 | -0.30 | -0.75 | -0.75 | 1.24  | 0.43 |
|       | WCH | -0.78 | 0.01  | -0.87 | -0.87 | 1.87  | 0.41 |
|       | CCS | -0.90 | 0.09  | -0.11 | -0.11 | 1.82  | 0.14 |
| DTR   | SCA | 0.00  | 0.11  | -0.44 | -0.44 | -0.01 | 0.12 |
|       | BYP | -0.63 | -0.34 | 0.14  | 0.14  | 1.17  | 0.15 |
|       | NP  | -0.26 | -0.28 | -1.04 | -1.04 | 0.88  | 0.73 |
|       | WCH | -0.38 | -0.59 | -0.65 | -0.65 | 0.90  | 0.55 |
|       | CCS | -0.66 | 0.20  | -0.42 | -0.42 | 1.28  | 0.24 |
| P     | SCA | -0.05 | 0.04  | -0.07 | -0.07 | -0.08 | 0.12 |
|       | BYP | -0.19 | 0.17  | 0.35  | 0.35  | 0.37  | 0.14 |

|        |     |       |       |       |       |       |      |
|--------|-----|-------|-------|-------|-------|-------|------|
|        | NP  | 0.43  | -0.14 | 0.15  | 0.15  | -0.88 | 0.04 |
|        | WCH | -0.09 | -0.11 | 0.17  | 0.17  | 0.06  | 0.04 |
|        | CCS | 0.95  | -0.22 | 0.08  | 0.08  | -1.93 | 0.16 |
| T      | SCA | -1.21 | 0.75  | 0.38  | 0.38  | 2.34  | 0.76 |
|        | BYP | -1.39 | 0.56  | 0.20  | 0.20  | 2.75  | 0.57 |
|        | NP  | -1.79 | 0.70  | -0.01 | -0.01 | 3.65  | 0.72 |
|        | WCH | -1.41 | 0.43  | 0.38  | 0.38  | 2.79  | 0.60 |
|        | CCS | -1.82 | 0.44  | 0.32  | 0.32  | 3.59  | 0.80 |
| PET    | SCA | -1.30 | 0.74  | 0.36  | 0.36  | 2.55  | 0.77 |
|        | BYP | -1.61 | 0.56  | 0.07  | 0.07  | 3.26  | 0.60 |
|        | NP  | -1.86 | 0.69  | -0.12 | -0.12 | 3.85  | 0.69 |
|        | WCH | -1.51 | 0.48  | 0.18  | 0.18  | 3.07  | 0.53 |
|        | CCS | -1.95 | 0.44  | 0.21  | 0.21  | 3.91  | 0.79 |
| $\phi$ | SCA | 0.48  | -0.32 | -0.24 | -0.24 | -1.11 | 0.26 |
|        | BYP | 0.27  | 0.00  | 0.34  | 0.34  | -0.58 | 0.08 |
|        | NP  | 0.92  | -0.27 | 0.24  | 0.24  | -1.96 | 0.14 |
|        | WCH | 0.34  | -0.21 | 0.10  | 0.10  | -0.82 | 0.06 |
|        | CCS | 1.48  | -0.34 | -0.04 | -0.04 | -2.98 | 0.43 |
| PDJF   | SCA | -0.24 | 0.06  | 0.15  | 0.15  | 0.17  | 0.04 |
|        | BYP | 0.39  | 0.10  | -0.13 | -0.13 | -0.48 | 0.08 |
|        | NP  | 0.41  | 0.24  | 0.15  | 0.15  | -1.05 | 0.11 |
|        | WCH | 0.18  | 0.00  | 0.07  | 0.07  | -0.49 | 0.01 |

|      |     |       |       |       |       |       |      |
|------|-----|-------|-------|-------|-------|-------|------|
|      | CCS | 0.27  | 0.21  | 0.29  | 0.29  | -1.05 | 0.08 |
| PMAM | SCA | 1.51  | 0.18  | -0.18 | -0.18 | 1.98  | 0.11 |
|      | BYP | -1.99 | 0.34  | -0.16 | -0.16 | 2.12  | 0.27 |
|      | NP  | 1.00  | 0.64  | 0.15  | 0.15  | 0.15  | 0.14 |
|      | WCH | -0.40 | 0.45  | 0.07  | 0.07  | 0.97  | 0.14 |
|      | CCS | 1.76  | 0.56  | 0.07  | 0.07  | 0.01  | 0.07 |
| PJJA | SCA | 0.29  | 0.30  | -0.17 | -0.17 | -1.21 | 0.16 |
|      | BYP | -0.89 | 0.03  | 0.13  | 0.13  | -0.25 | 0.04 |
|      | NP  | -0.57 | -0.01 | 0.00  | 0.00  | -1.96 | 0.13 |
|      | WCH | -0.44 | -0.12 | 0.00  | 0.00  | -0.91 | 0.09 |
|      | CCS | 0.05  | -0.08 | -0.07 | -0.07 | -2.75 | 0.29 |
| PSON | SCA | 0.96  | -0.32 | 0.16  | 0.16  | 0.49  | 0.15 |
|      | BYP | -0.20 | 0.10  | -0.01 | -0.01 | 0.97  | 0.04 |
|      | NP  | 0.18  | -0.34 | 0.05  | 0.05  | 1.13  | 0.13 |
|      | WCH | 0.78  | -0.38 | 0.29  | 0.29  | 0.85  | 0.14 |
|      | CCS | 0.36  | -0.33 | -0.02 | -0.02 | 0.41  | 0.13 |

## Section 5. Detection and attribution analysis for selected clusters in Central America.

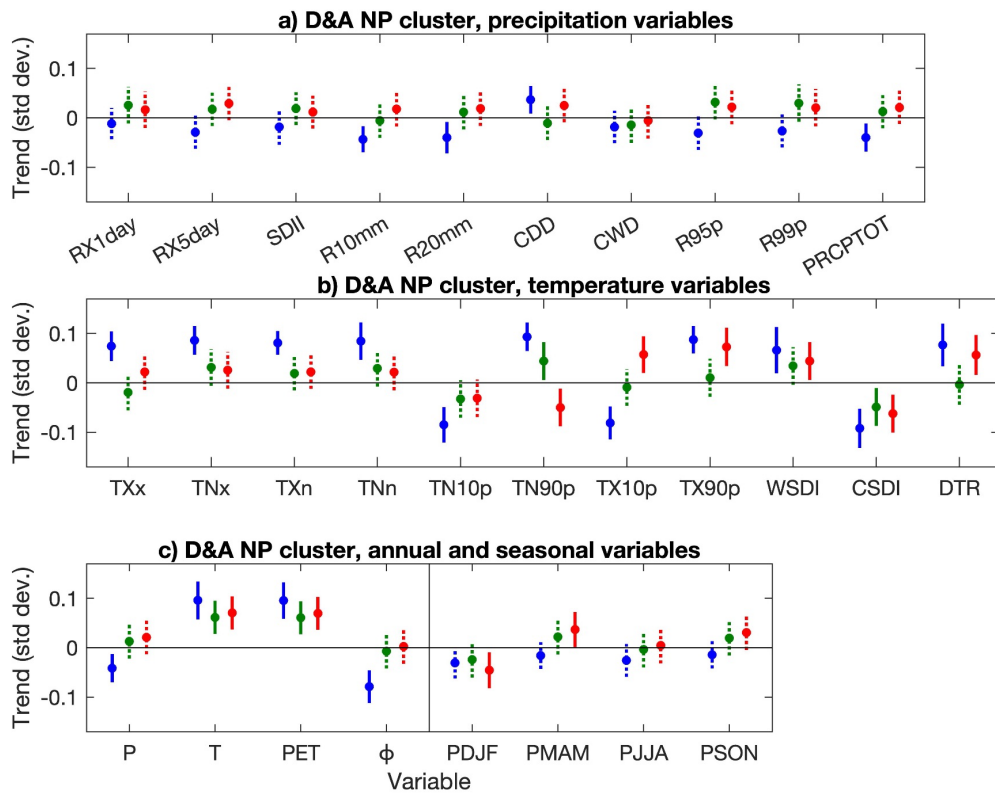

Fig S5 Results of detection and attribution analysis for the North Pacific cluster (NP; see Fig. 1). The analysis was performed for precipitation (top panel) and temperature (middle panel) CLIMDEX extreme indices (definitions in tables S2 and S3 in the Supplementary Information). Also shown in the bottom panel are the analysis for the annual averages of precipitation (P), 2-m temperature (T), potential evapotranspiration (PET) and the  $\phi$  aridity index (defined as P/PET). The four rightmost variables in the bottom panel display the trends of the boreal seasonal precipitation averages. Blue dots represent trends in each standardized variables from a historical run involving an ensemble of 10 models, while the blue confidence intervals are constructed based on the ensemble noise derived from the respective preindustrial control runs. Green dots represent trends based on W5E5 data, with their confidence intervals computed using the synthetic generation described by McKinnon and Deser (2021). Red dots represent trends from the CHIRPs and CHIRTs “observations” (Funk et al. 2015), with the noise levels matching the green methodology. Trends that can (cannot) be detected from the natural variability noise are shown with solid (dotted) lines, according to the different methods applied. The trends correspond to the period 1983-2016 for the blue and red analysis, and from 1979 to 2019 for the green analysis

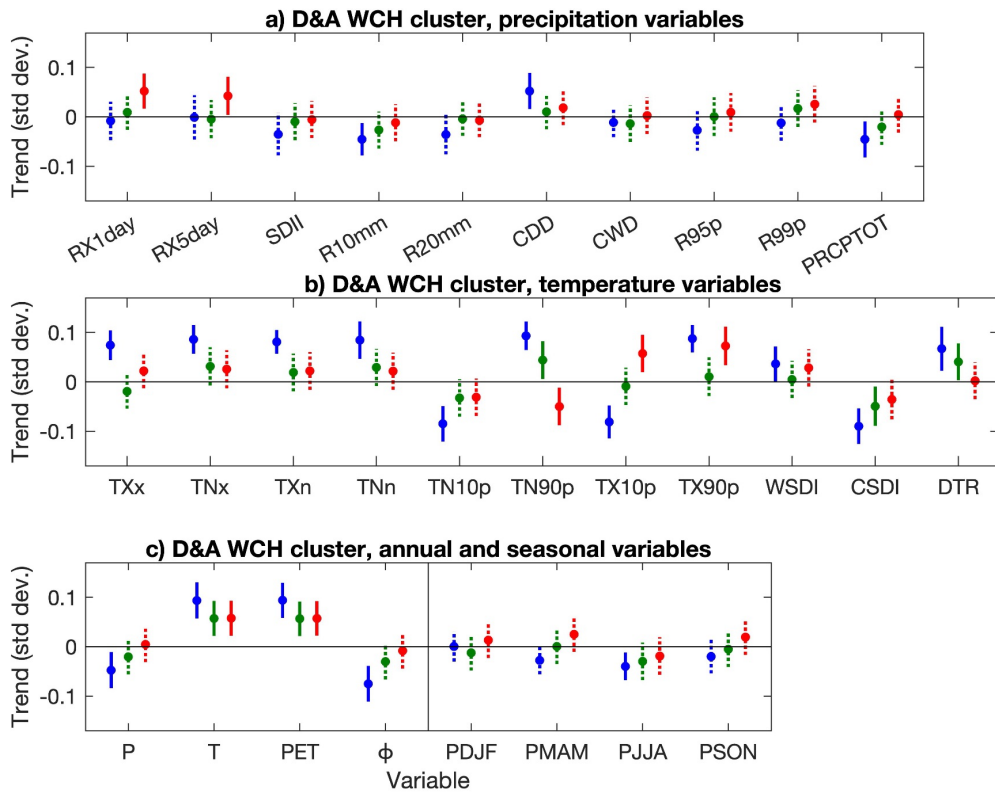

Fig. S6 Same as in Fig. S5 but for the WCH cluster.
